# Supplementary material for: Epigenetic Signatures Discriminate Patients With Primary Sclerosing Cholangitis and Ulcerative Colitis From Patients With Ulcerative Colitis
Source: PubMed Central journal article supplement (PMC8965896; doi:10.3389/fimmu.2022.840935), 2022-03-16
Supplement: DataSheet_1.pdf [file DataSheet_1.pdf]

## *Supplementary Material*

### **Supplementary Methods**

1000 ng DNA was used as input in 8 ul total (H<sub>2</sub>O added), 2 ul of primermix (5 mM of each primer) and 10 ul of DreamTaq® Green PCR Master Mix (2X) was added to each sample. The following PCR program was used:

1. 95°C, 3 minutes
2. 98°C, 20 seconds
3. 62°C, 20 seconds
4. 72°C, 1 minute
5. step 2 – step 4 repeated 34 times
6. 72°C, 5 minutes
7. 4°C, ∞

After the PCR amplification samples were loaded on an ethidium bromide-stained 1% agarose gel and checked for the presence of a PCR product with the right size, followed by PCR clean-up with the Agencourt AMPure PCR purification kit (Beckman Coulter) in ratio 1:1. Cleaned up PCR products were used for Sanger sequencing. BigDye® Terminator v1.1 cycle sequencing was performed before Sanger sequencing, this cycle sequencing was a simple method in which successive rounds of denaturation, annealing and extension in a thermal cycler results in the incorporation of fluorescent dye labelled terminators into the DNA extension products. 10 ng DNA input in a total of 6,5 ul (H<sub>2</sub>O added) was used, 3,5 ul of mastermix was added (1 ul 0,5 mM of either reverse or forward NINJ2 primer, 0,5 ul of BigDye Terminator v1.1 cycle and 2 ul of 5x BigDye® Terminator sequencing buffer V1.1). The samples were ran in the PCR with the following program:

1. 96°C, 60 seconds
2. 96°C, 30 seconds
3. 50°C, 10 seconds
4. 60°C, 4 minutes
5. step 2- step 4 30x repeated

## Supplementary Tables

**Supplementary Table 1** – Top 10 differentially methylated regions when comparing PSC-UC with UC

| Chromosome | Start    | End      | Width | No. cpgs | Min FDR  | Stouffer | Max betafc | Mean betafc | Overlapping promoters |
|------------|----------|----------|-------|----------|----------|----------|------------|-------------|-----------------------|
| Chr 15     | 94651923 | 94652513 | 591   | 3        | 0.0236   | 0.899857 | -0.03557   | -0.02017    | CTD-2643K12.3         |
| Chr 16     | 56486263 | 56486336 | 74    | 3        | 0.010073 | 0.899857 | -0.03981   | -0.03013    | NUDT21<br>OGFOD1      |
| Chr 2      | 42275672 | 42276442 | 771   | 3        | 0.071437 | 0.899857 | 0.023197   | 0.015015    | PKDCC                 |
| Chr 2      | 1.72E+08 | 1.72E+08 | 473   | 3        | 0.008439 | 0.899857 | 0.033163   | 0.024358    | SP5                   |
| Chr 20     | 47364640 | 47365070 | 431   | 3        | 0.004625 | 0.899857 | 0.106079   | 0.084602    | NA                    |
| Chr 20     | 61640931 | 61641454 | 524   | 3        | 0.016971 | 0.899857 | 0.084884   | 0.071537    | RP11-305P22.9         |
| Chr 22     | 40389805 | 40390264 | 460   | 3        | 0.015927 | 0.899857 | 0.037399   | 0.0208      | FAM83F                |
| Chr 4      | 1.22E+08 | 1.22E+08 | 324   | 3        | 0.010769 | 0.899857 | 0.057458   | 0.046863    | TNIP3                 |
| Chr 7      | 1.17E+08 | 1.17E+08 | 46    | 3        | 0.015845 | 0.899857 | 0.045642   | 0.040346    | ST7                   |

Top 10 differentially methylated regions in comparison between patients with PSC-UC and UC. Minfdr, minimal FDR adjusted p-value; Stouffer, metric of interest for defining statistically significant DMRs; maxbetafc, maximum difference in beta values within this region; meanbetafc, mean difference in beta values within this region; NA, not applicable.

**Supplementary Table 2** – Methylation status of probes associated with PSC-associated genes

|                | PSC-UC vs UC |       |       |              | PSC-UC vs HC |       |       |              |
|----------------|--------------|-------|-------|--------------|--------------|-------|-------|--------------|
|                | NSig         | Total | Prop  | pval         | NSig         | Total | Prop  | pval         |
| <i>BACH2</i>   | 23           | 137   | 0.202 | <b>0.010</b> | 8            | 137   | 0.062 | <b>0.042</b> |
| <i>ASAP2</i>   | 18           | 112   | 0.191 | <b>0.027</b> | 5            | 112   | 0.047 | 0.165        |
| <i>DDIT4</i>   | 9            | 58    | 0.184 | 0.052        | 7            | 58    | 0.137 | <b>0.024</b> |
| <i>CBX5</i>    | 4            | 48    | 0.091 | 0.104        | 0            | 48    | 0.000 | 0.509        |
| <i>FOXP1</i>   | 15           | 295   | 0.054 | 0.157        | 14           | 295   | 0.050 | <b>0.018</b> |
| <i>NFKB1</i>   | 7            | 69    | 0.113 | 0.168        | 3            | 69    | 0.045 | 0.406        |
| <i>ITGAE</i>   | 5            | 111   | 0.047 | 0.169        | 4            | 111   | 0.037 | 0.085        |
| <i>RSPO3</i>   | 3            | 32    | 0.103 | 0.227        | 2            | 32    | 0.067 | 0.163        |
| <i>CFLAR</i>   | 8            | 160   | 0.053 | 0.266        | 2            | 160   | 0.013 | 0.942        |
| <i>ITGB1</i>   | 3            | 32    | 0.103 | 0.285        | 2            | 32    | 0.067 | <b>0.028</b> |
| <i>TCF4</i>    | 11           | 162   | 0.073 | 0.296        | 5            | 162   | 0.032 | 0.831        |
| <i>GPR35</i>   | 1            | 26    | 0.040 | 0.327        | 0            | 26    | 0.000 | 0.620        |
| <i>CCL25</i>   | 0            | 12    | 0.000 | 0.343        | 0            | 12    | 0.000 | 0.144        |
| <i>PIGF</i>    | 5            | 77    | 0.069 | 0.346        | 2            | 77    | 0.027 | 0.663        |
| <i>CCR10</i>   | 0            | 18    | 0.000 | 0.376        | 0            | 18    | 0.000 | 0.747        |
| <i>FUBP1</i>   | 4            | 27    | 0.174 | 0.392        | 1            | 27    | 0.038 | 0.192        |
| <i>STAT3</i>   | 4            | 54    | 0.080 | 0.403        | 2            | 54    | 0.038 | 0.396        |
| <i>CDH1</i>    | 2            | 56    | 0.037 | 0.421        | 1            | 56    | 0.018 | 0.769        |
| <i>CLEC16A</i> | 12           | 179   | 0.072 | 0.423        | 5            | 179   | 0.029 | 0.463        |
| <i>CXCL12</i>  | 1            | 27    | 0.038 | 0.456        | 0            | 27    | 0.000 | 0.605        |
| <i>IL2RA</i>   | 2            | 38    | 0.056 | 0.460        | 3            | 38    | 0.086 | 0.095        |
| <i>ITGA4</i>   | 5            | 58    | 0.094 | 0.474        | 1            | 58    | 0.018 | 0.140        |
| <i>CCL28</i>   | 1            | 29    | 0.036 | 0.482        | 1            | 29    | 0.036 | 0.382        |
| <i>SIK2</i>    | 6            | 48    | 0.143 | 0.491        | 1            | 48    | 0.021 | 0.452        |
| <i>EML4</i>    | 3            | 46    | 0.070 | 0.491        | 0            | 46    | 0.000 | 0.092        |
| <i>RBM5</i>    | 4            | 43    | 0.103 | 0.500        | 0            | 43    | 0.000 | 0.704        |
| <i>CXCL16</i>  | 2            | 47    | 0.044 | 0.612        | 4            | 47    | 0.093 | 0.051        |
| <i>MS4A4A</i>  | 1            | 15    | 0.071 | 0.615        | 0            | 15    | 0.000 | 0.595        |
| <i>ITGB7</i>   | 2            | 45    | 0.047 | 0.635        | 4            | 45    | 0.098 | 0.112        |
| <i>HDAC7</i>   | 1            | 63    | 0.016 | 0.638        | 6            | 63    | 0.105 | 0.123        |
| <i>MADCAM1</i> | 1            | 17    | 0.063 | 0.654        | 1            | 17    | 0.063 | 0.379        |
| <i>CCDC88B</i> | 2            | 47    | 0.044 | 0.659        | 0            | 47    | 0.000 | 0.461        |
| <i>CD226</i>   | 3            | 28    | 0.120 | 0.661        | 2            | 28    | 0.077 | 0.202        |
| <i>PSMG1</i>   | 4            | 54    | 0.080 | 0.666        | 5            | 54    | 0.102 | 0.134        |
| <i>TNFAIP6</i> | 0            | 11    | 0.000 | 0.681        | 1            | 11    | 0.100 | <b>0.036</b> |
| <i>TENT2</i>   | 0            | 2     | 0.000 | 0.704        | 0            | 2     | 0.000 | 0.259        |
| <i>ADM</i>     | 1            | 38    | 0.027 | 0.774        | 0            | 38    | 0.000 | 0.321        |
| <i>PPIA</i>    | 0            | 18    | 0.000 | 0.774        | 0            | 18    | 0.000 | 0.550        |
| <i>WTAP</i>    | 1            | 30    | 0.034 | 0.811        | 2            | 30    | 0.071 | 0.248        |

## Supplementary Material

|                 |   |     |       |       |   |     |       |              |
|-----------------|---|-----|-------|-------|---|-----|-------|--------------|
| <i>CCR9</i>     | 1 | 14  | 0.077 | 0.816 | 0 | 14  | 0.000 | 0.117        |
| <i>KIAA0146</i> | 2 | 44  | 0.048 | 0.822 | 2 | 44  | 0.048 | 0.110        |
| <i>PPP3CB</i>   | 0 | 34  | 0.000 | 0.826 | 1 | 34  | 0.030 | 0.624        |
| <i>RIC8B</i>    | 1 | 36  | 0.029 | 0.833 | 1 | 36  | 0.029 | 0.326        |
| <i>SMAD5</i>    | 1 | 25  | 0.042 | 0.836 | 0 | 25  | 0.000 | 0.119        |
| <i>N4BP2L2</i>  | 1 | 54  | 0.019 | 0.839 | 1 | 54  | 0.019 | 0.828        |
| <i>JAK3</i>     | 1 | 45  | 0.023 | 0.849 | 4 | 45  | 0.098 | 0.063        |
| <i>UBASH3A</i>  | 2 | 30  | 0.071 | 0.851 | 6 | 30  | 0.250 | <b>0.006</b> |
| <i>PCGF3</i>    | 5 | 122 | 0.043 | 0.924 | 2 | 122 | 0.017 | 0.485        |
| <i>IREB2</i>    | 1 | 33  | 0.031 | 0.958 | 2 | 33  | 0.065 | 0.455        |
| <i>SOCS3</i>    | 0 | 39  | 0.000 | 0.960 | 4 | 39  | 0.114 | <b>0.039</b> |
| <i>MST1</i>     | 0 | 5   | 0.000 | 0.987 | 0 | 5   | 0.000 | 0.215        |
| <i>CD28</i>     | 0 | 17  | 0.000 | 0.998 | 3 | 17  | 0.214 | <b>0.007</b> |

**Supplementary Table 3** – Regions/DMPs associated with PSC-UC upon classification analysis on PSC-UC and HC samples

| <b>Location</b> | <b>Associated gene</b> | <b>Chromosome</b> | <b>Difference in methylation in PSC-UC vs UC</b> | <b>Feature Importance</b> |
|-----------------|------------------------|-------------------|--------------------------------------------------|---------------------------|
| cg23899408      | <i>HOOK2</i>           | Chr 19            | Hypermethylation                                 | 4.031324                  |
| cg16397968      | <i>PFKP</i>            | Chr 10            | Hypomethylation                                  | 3.166667                  |
| cg22715629      | <i>CNOT1</i>           | Chr 16            | Hypermethylation                                 | 3.145012                  |
| cg11738485      | <i>HOOK2</i>           | Chr 19            | Hypermethylation                                 | 2.812812                  |
| cg16361921      |                        | Chr 5             | Hypomethylation                                  | 2.078962                  |
| cg05995465      | <i>HDAC4</i>           | Chr 2             | Hypermethylation                                 | 1.91791                   |
| cg03997626      | <i>SIAH3</i>           | Chr 13            | Hypomethylation                                  | 1.467478                  |
| cg02168270      |                        | Chr 8             | Hypomethylation                                  | 1.437908                  |
| cg18136963      |                        | Chr 6             | Hypomethylation                                  | 1.416403                  |
| cg06417478      | <i>HOOK2</i>           | Chr 19            | Hypermethylation                                 | 1.187516                  |
| cg08919780      | <i>CDK13</i>           | Chr 7             | Hypermethylation                                 | 0.96423                   |
| cg04657146      | <i>HOOK2</i>           | Chr 19            | Hypermethylation                                 | 0.883303                  |
| cg09352518      | <i>ZNF714</i>          | Chr 19            | Hypomethylation                                  | 0.880487                  |
| cg17404449      | <i>LOC100133091</i>    | Chr 7             | Hypermethylation                                 | 0.810458                  |
| cg13830619      |                        | Chr 12            | Hypomethylation                                  | 0.802466                  |
| cg07037055      |                        | Chr 13            | Hypermethylated                                  | 0.754085                  |
| cg23923019      | <i>ABCC5-AS1.ABCC5</i> | Chr 3             | Hypermethylated                                  | 0.64244                   |
| cg07796016      | <i>LCE1C</i>           | Chr 1             | Hypermethylated                                  | 0.602941                  |
| cg22888160      |                        | Chr 1             | Hypermethylated                                  | 0.578918                  |
| cg06864789      |                        | Chr 6             | Hypomethylated                                   | 0.556649                  |
| cg10993865      | <i>CARS2</i>           | Chr 13            | Hypermethylated                                  | 0.490196                  |
| cg02693227      | <i>ALG1L2</i>          | Chr 3             | Hypomethylated                                   | 0.478548                  |
| cg13774807      | <i>TEK</i>             | Chr 9             | Hypermethylated                                  | 0.392125                  |
| cg02533724      |                        | Chr 10            | Hypomethylated                                   | 0.277778                  |
| cg25755428      | <i>MRII</i>            | Chr 19            | Hypomethylated                                   | 0.272321                  |

**Supplementary Table 4** – Primer sequences

| <b>Gene</b>  | <b>Technique</b>     | <b>Forward sequence</b>                                                                                         | <b>Reverse sequence</b>                                                                                          |
|--------------|----------------------|-----------------------------------------------------------------------------------------------------------------|------------------------------------------------------------------------------------------------------------------|
| <i>NINJ2</i> | Sanger<br>Sequencing | CCCTCATCAGCCTCTCTCTG<br>GATCCCAAGGGCTTGACTCC<br>TCGTCGGCAGCGTCAGATGTGT<br>ATAAGAGACAGCTCAGGTGAG<br>TAAATTTCGAGA | CGTTGTTGAGCTGGTTGAGT<br>GAAAAAGAGCACTCTTCAGCCC<br>GTCTCGTGGGCTCGGAGATGTG<br>TATAAGAGACAGTTTGGAGACG<br>GAGGTGGATA |
| <i>NINJ2</i> | Bisulfite<br>PCR-Seq | CGTCGGCAGCGTCAGATGTGTA<br>TAAGAGACAGAGGTTGTGATA<br>GGGGTTATTA                                                   | GTCTCGTGGGCTCGGAGATGTG<br>TATAAGAGACAGACCTATATAA<br>TACAAATCCCCAAAAA                                             |
| <i>NINJ2</i> | qPCR                 | QT00088200 (Qiagen)                                                                                             |                                                                                                                  |
| <i>GAPDH</i> | qPCR                 | GTCAGTGGTGGACCTGACCT                                                                                            | TGAGCTTGACAAAGTGGTTCG                                                                                            |
| <i>HPRT</i>  | qPCR                 | CCTGGCGTCGTGATTAGTGAT                                                                                           | AGACGTTGAGTCTGTCCATAA                                                                                            |

**Supplementary Table 5** – Antibody Panel Mass Cytometry

## Antibodies pre-fixation:

| Target            | Metal     | Source   | Purpose                                                |
|-------------------|-----------|----------|--------------------------------------------------------|
| CD194 (CCR4)      | 158Gd     | Fluidigm | T and B lymphocytes, basophils, monocytes and NK cells |
| CD195 (CCR5)      | 144Nd     | Fluidigm | T lymphocytes and monocytes                            |
| CD183 (CXCR3)     | 156Gd     | Fluidigm | Chemokine receptor, T lymphocytes                      |
| $\alpha 4\beta 7$ | 171Yb     | Takeda   | Intestinal homing T lymphocytes                        |
| CCR9              | 168Er     | Fluidigm | Intestinal homing T lymphocytes                        |
| CCR10             | 148Nd     | R&D      | Intestinal homing T lymphocytes                        |
| Cisplatin         | 194–195Pt | Fluidigm | Live/dead discrimination                               |

## Antibodies nuclear staining:

| Target         | Metal | Source            | Purpose                |
|----------------|-------|-------------------|------------------------|
| CD152 (CTLA-4) | 161Dy | Fluidigm          | Co inhibitory molecule |
| CES-1          | 175Lu | Thermo Scientific | Myeloid cells          |

## Antibodies post-fixation:

| Target         | Metal     | Source   | Purpose                                                    |
|----------------|-----------|----------|------------------------------------------------------------|
| CD45           | 89Y       | Fluidigm | All leukocytes                                             |
| CD49d          | 141Pr     | Fluidigm | Integrin alpha subunit.                                    |
| CD11a          | 142Nd     | Fluidigm | Integrin alpha L chain                                     |
| CD5            | 143Nd     | Fluidigm | Activated lymphocytes                                      |
| CD4            | 145Nd     | Fluidigm | T helper lymphocytes                                       |
| CD8a           | 146Nd     | Fluidigm | Cytotoxic T lymphocytes                                    |
| CD7            | 147Sm     | Fluidigm | T lymphocytes                                              |
| CD25 (IL-2R)   | 149Sm     | Fluidigm | Activated T lymphocytes, regulatory T cells                |
| CD134 (OX40)   | 150Nd     | Fluidigm | Co-stimulatory molecule                                    |
| CD2            | 151Eu     | Fluidigm | T lymphocytes, NK cells                                    |
| CD95/Fas       | 152Sm     | Fluidigm | Apoptosis                                                  |
| TIM-3          | 153Eu     | Fluidigm | Co inhibitory molecule                                     |
| CD14           | 154Sm     | Fluidigm | Monocytes                                                  |
| CD279 (PD-1)   | 155Gd     | Fluidigm | Activated lymphocytes, immune checkpoint                   |
| CD197 (CCR7)   | 159Tb     | Fluidigm | Activated lymphocytes, homing to sec. lymphoid organs      |
| CD28           | 160Gd     | Fluidigm | Co-stimulatory molecule, activated T lymphocytes           |
| CD69           | 162Dy     | Fluidigm | Activated lymphocytes                                      |
| CD161          | 164Dy     | Fluidigm | NK cells                                                   |
| CD45RO         | 165Ho     | Fluidigm | All leukocytes                                             |
| CD44           | 166Er     | Fluidigm | Activated lymphocytes                                      |
| CD27           | 167Er     | Fluidigm | Activated lymphocytes                                      |
| CD45RA         | 169Tm     | Fluidigm | All leukocytes                                             |
| CD3            | 170Er     | Fluidigm | T lymphocytes                                              |
| CD57           | 172Yb     | Fluidigm | NK cells                                                   |
| CD137/4-1BB    | 173Yb     | Fluidigm | Macrophages, activated B cells, and dendritic cells        |
| HLA-DR         | 174Yb     | Fluidigm | Antigen presenting cells                                   |
| CD127 (IL-7Ra) | 176Yb     | Fluidigm | Memory and effector T cells, immature B cell proliferation |
| CD16           | 209Bi     | Fluidigm | Monocytes                                                  |
| Barcodes       | 103–110Pd | Fluidigm | Staining standardization and doublet discrimination        |
| Iridium        | 191–193Ir | Fluidigm | Cell identification                                        |

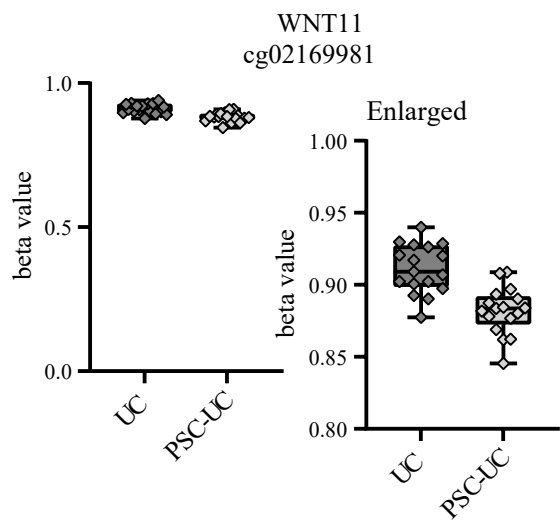

**Supplementary Figure 1. WNT11 contains a differentially methylated position in patients with PSC-UC compared to patients with UC.** A: Dot boxplot with enlarged representation for the CpG cg02169981 associated to WNT11 with visualization of the percentage methylation (beta value) on the Y axis for PSC-UC and UC.



A

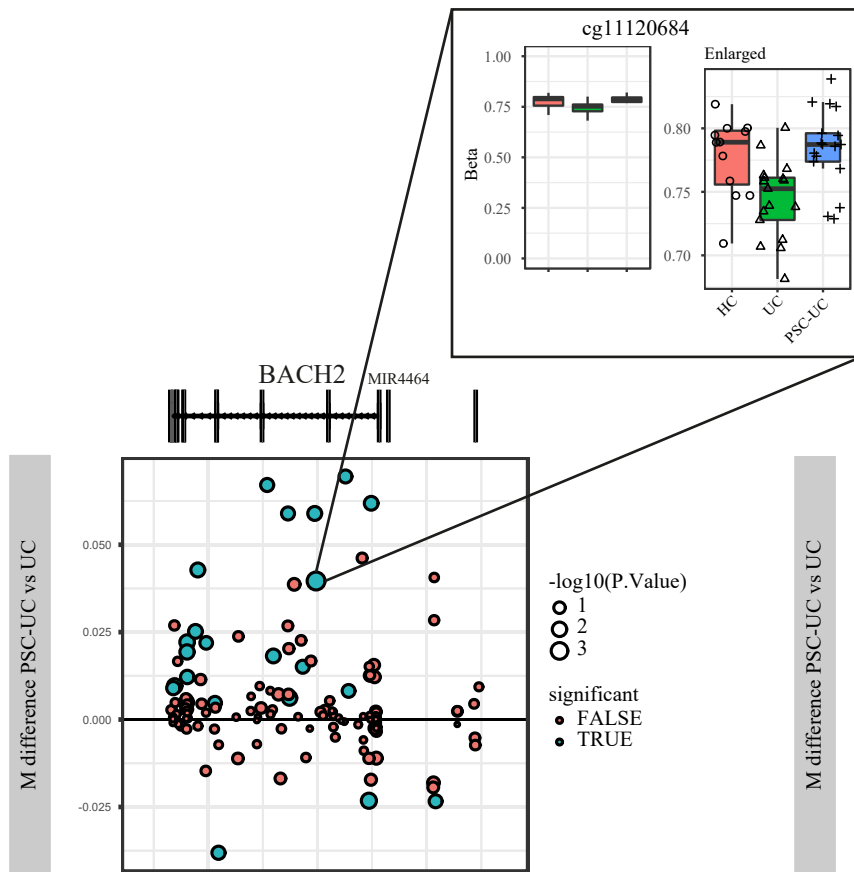

B

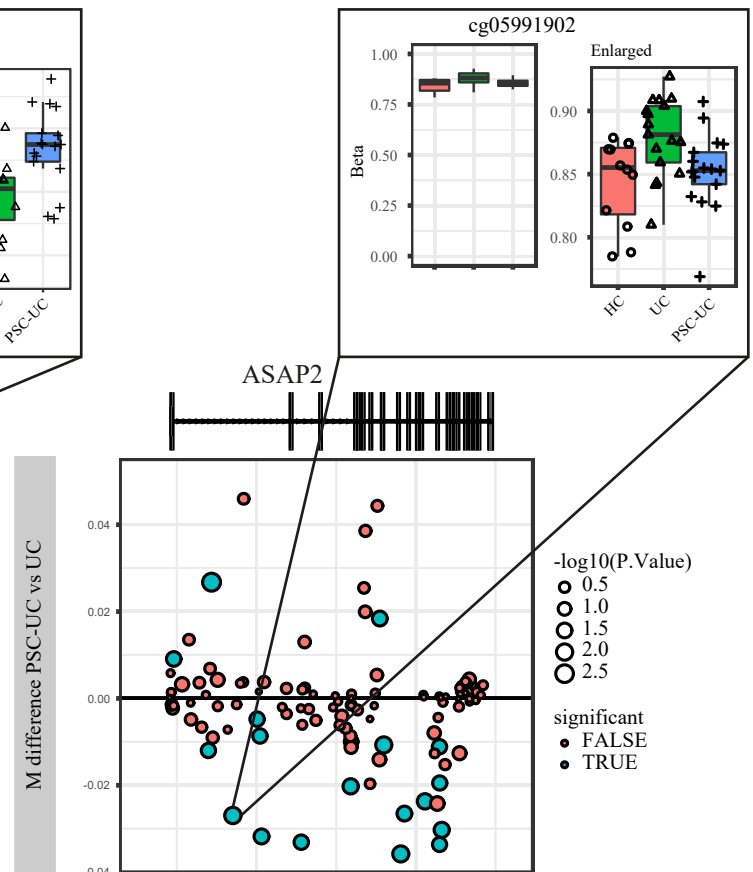

C

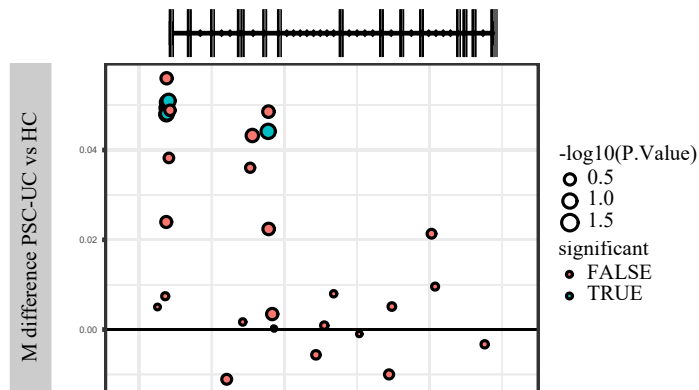

**Supplementary Figure 2. BACH2 and ASAP2 contain hypothesis driven differentially methylated positions in patients with PSC-UC compared to patients with UC.** Visualization of the loess smoothed mean percentage methylation difference PSC-UC vs UC per probe across the gene representation for BACH2 and ASAP2. Sizes of the dots represent the  $\log_{10}(\text{p value})$ . A: Enlarged dot boxplots for the significant CpG cg11120684 associated to BACH2. B: Enlarged dot boxplots for the significant CpG cg05991902 associated to ASAP2. C: Visualization of the loess smoothed mean percentage methylation difference PSC-UC vs HC per probe across the gene representation for UBASH3A.

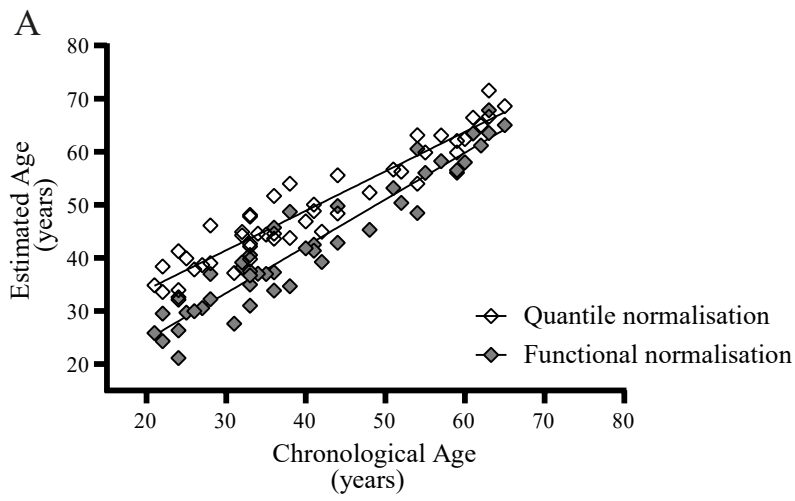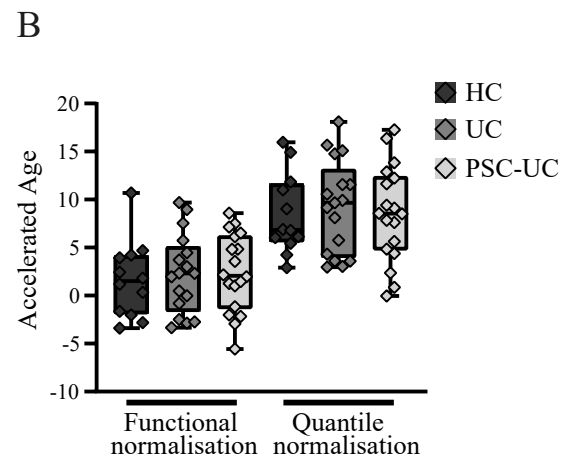

**Supplementary Figure 3. Comparison of normalisation methods for determination of age acceleration.**

A: Correlation between chronological age and estimated age based on DNA methylation using both quantile and functional normalization methods. B: Comparison of accelerated age (difference between chronological age and estimated age) between patients with PSC-UC, UC and HC with both functional and quantile normalisation.

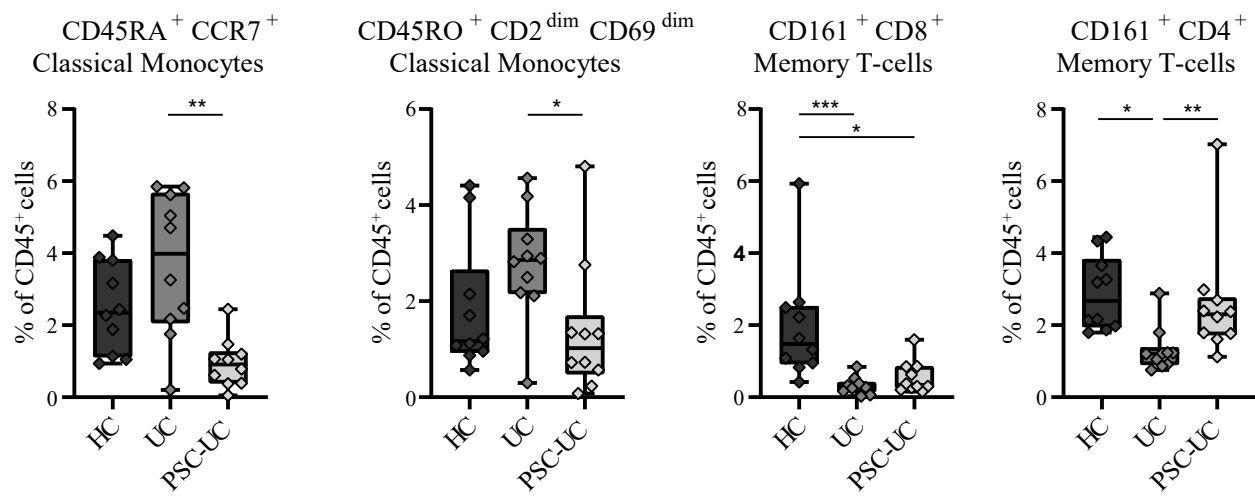

**Supplementary Figure 4. Peripheral blood cell distribution of differential immune cell populations between PSC-UC, UC and HCs.** Immune cell phenotype frequencies measured with cyTOF per patient cohort plotted as a fraction of total CD45+ cells. Statistical testing was performed using Kruskal Wallis with Dunn's correction for multiple testing. A p-value <0.05 was considered statistically significant (\*p<0.05, \*\* p<0.01, \*\*\*< 0.001).

```
AGCTCTCAGGTGAGTAAATTCGCAGATGCCACGCATGTCTGGAACATACCCCAGGGGTCATTAGAGAC
TGCCCCAGCAGAGGGGGAGGATCTCCGTTTGTCTTTCCCTCAGAA CGTTTGTCCGGAGAGCATCCTGT
TCTGTTATATGCATATCCACCTCCGTCTCCAAATTAAGGTTGAGCACAGTGTCTAGTGCCTGGCATT
GAGTTAGAAATAGAAAAAGAGTGGCGAGTCCCGGCCGAGGCTGTGACAGGGGCCATTACTGAGCCCA
CTCCCCACCAACCTTTCTGCGGTTTAACTGACTCTCCTCCTCCCTCCAGATCCCAAGGGCTTGACTC
CTACCTCCTCTAAGGCATTTTGAAAAGTTTGCAAAATGCACCCTTGATCCTAGCA CGTACTTAAGAAGCG
GCTCCCCCTAGAACGTCAGGCTTGAAGCTGACCCCTTCTTCCCTCCCGCGCCATTGGGTCTGTGC
GCAGGGCCGGAAGCTGCTGGGGAGGGGCACGAGGC CGGGCTGGGGCCTCTCCGGAGGGAGCCCGCCGC
CCCGCCAGGGCGCACGCACCCAGCCTCTGAGGGAGGAAGCTGAATGGGGCCAGAGGCTGGCCCTCTTT
GGGGATTTGCATTATACAGGCTGTATTTAGAAGCAGCGCGGGGAGCGGTGGCTCACGCCTGTGATCCC
AGCATTTGGGGGGCCGAGGCGGCAGATCACCTGAGGCCAGGAGTTCGAGACCAGCCTGTCAACATGG
TGAAACTCCGTCTGTGCTAAAAATACAAAAAAATAGCCAGGCGTGGTGGCCGAGCCTGCAGTCCCA
GCTACTCGGGAGGCTGAGGCAGGAGAATCGCTTGAACCCGGGAGATGGAGCTTGCAGTGAGCCGAGATC
ACACCCTGCCTCCAGCCTGGGCAACTCAGCGAGACTCCGCTCAAAAAACAAAAACAAAAACAAA
AACAAAAACCAAGAAAAAGAGAATAAAAAAAATAGAAGCAGCTTTCTTGTGATAGAAAGCAATGAC
CCTCTCTGCTATAATTACAACCTGAAGAGTCACTTTCTTTCAAAAACTCTATTTTCAGATGTTTACCCT
TTCTTTAAAAAGGAAAAAAATTTGCCCTCAAGGCAGGCAGTCCCCAGGGCATTCTGGTCTCCTGGGGA
AGGAACCTAAGAGCGGTTTGGTAAAATTCATTTTGCTATCTTGG CGTTACCTAAGGGCAAGAACTGAG
GTGGGGCTTTGGTGACAGCAGGGGCTGAAGAGTGCTCTTTTTCATCATCCAGGGTGTC
```

**Supplementary Figure 5. Reference sequence of NINJ2.** Position chr12:739,280 - 740,338 (human genome build 19). In yellow marked the CpG sites of interest with predictive value for distinguishing PSC-UC and UC: cg01201512 (chr12:740,338), cg14911689 (chr12:739,980) cg26371957 (chr12:739,280) and cg26654770 (chr12:740,100).
